# Supplementary material for: Ecophysiological responses of Fucus virsoides (Phaeophyceae, Fucales) to past and present nutrient conditions in the northern Adriatic
Source: Springer Nature journal article supplement (doi:10.1007/s00227-024-04523-1), 2024-10-07
Supplement: MOESM1 [file 227_2024_4523_MOESM1_ESM.pdf]

**Ecophysiological responses of *Fucus virsoides* (Phaeophyceae, Fucales) to past and present nutrient conditions in the northern Adriatic**

Descourvières E.<sup>1,2\*a</sup>, Mulas M.<sup>2\*†</sup>, Natale S.<sup>3</sup>, Sánchez de Pedro R.<sup>4</sup>, Alboresi A.<sup>3</sup>, Solidoro C.<sup>2,5</sup>,  
Bandelj V.<sup>2,5</sup>, Falace A.<sup>1,2</sup>

<sup>1</sup> Department Life Sciences, University of Trieste, Trieste, Italy

<sup>2</sup> National Institute of Oceanography and Applied Geophysics – OGS, Trieste, Italy

<sup>3</sup> Department of Biology, University of Padua, Padua, Italy

<sup>4</sup> Departamento de Botánica y Fisiología Vegetal, Universidad de Málaga, Andalucía Tech, Campus de Teatinos, Málaga, Spain

<sup>5</sup> National Biodiversity Future Center, Palermo, Italy

\* These authors contributed equally to this work

† Current Address: Department of Biology, University of Pisa, Pisa, Italy

<sup>a</sup> corresponding e-mail address: emmanuelle.descourvieres@phd.units.it

**Figure S1.** Median values, 25<sup>th</sup> and 75<sup>th</sup> percentiles of survival (%) values between T1 and T4 measured in *F. virsoides* in the ‘*Germling experiment*’.

**Table S1.** Morphological features of *F. virsoides* germlings under R1= [DIN]:[P] ratio in 1996, R2= [DIN]:[P] ratio in 1996 and R3= [DIN]:[P] ratio in 2017. Mean values are expressed together with the standard deviation.

**Table S2.** Results of the Split-Plot ANOVA for differences in embryos density and survival and germling morphometry.

**Table S3.** Results of the Chi-square tests for adult photosynthetic performance analysis.

**Table S4.** *P*-value of pairwise comparisons between day 0 (T0) and day 12 (T3) of photosynthetic performance values for the different nutrient conditions.

**Table S5.** *P*-value of pairwise comparisons between nutrients conditions of photosynthetic performance values at day 0 (T0) and day 12 (T3).

**Figure S2.** Light response curves of electron transport rate (ETR) of dark-acclimated *F. virsoides* samples measured in the ‘*Adult experiment*’. Data points are an average of 6-9 independent measurements with error bars showing standard deviation.

**Figure S3.** Light response curves of quenching coefficient non-photochemical quenching (NPQ) of dark-acclimated *F. virsoides* samples measured in the ‘*Adult experiment*’. Data points are an average of 6-9 independent measurements with error bars showing standard deviation.

**Table S6.** Result of pairwise comparisons between nutrients conditions of RGR.

**Table S7.** Results of the Chi-Square tests for metabolic rate analysis.

**Table S8.** *P*-value of pairwise comparisons of metabolic rate values at day 0 (T0) and day 12 (T3).

**Figure S4.** Annual average of **a)** [DIN] and **b)** [P] concentrations ( $\mu\text{M}$ ) on the Adriatic coast from northern Italy to southern Albania, northern sub-basin, central sub-basin and southern sub-basin, from 1993 to 2017 calculated from EMODnet.

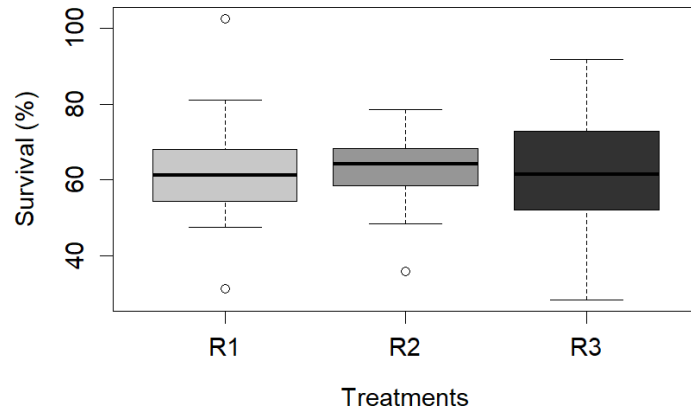

**Figure S1.**

**Table S1.**

|           | Embryo length ( $\mu\text{m}$ ) |                      |                      | Embryo width ( $\mu\text{m}$ ) |                      |                      | mean length hyalin hairs ( $\mu\text{m}$ ) |                       |                       | mean length rhizoids ( $\mu\text{m}$ ) |                       |                       |
|-----------|---------------------------------|----------------------|----------------------|--------------------------------|----------------------|----------------------|--------------------------------------------|-----------------------|-----------------------|----------------------------------------|-----------------------|-----------------------|
|           | R1                              | R2                   | R3                   | R1                             | R2                   | R3                   | R1                                         | R2                    | R3                    | R1                                     | R2                    | R3                    |
| <b>T1</b> | 114.77<br>$\pm$ 3.01            | 124.80 $\pm$<br>0.97 | 111.73 $\pm$<br>2.61 | 79.90 $\pm$<br>1.89            | 84.80 $\pm$<br>1.26  | 84.00 $\pm$<br>0.55  | -                                          | -                     | -                     | 164.10 $\pm$<br>24.01                  | 175.53 $\pm$<br>8.34  | 201.17 $\pm$<br>13.68 |
| <b>T2</b> | 163.53<br>$\pm$ 6.82            | 169.97 $\pm$<br>4.05 | 167.40 $\pm$<br>5.31 | 94.07 $\pm$<br>7.61            | 97.57 $\pm$<br>2.39  | 99.03 $\pm$<br>0.66  | 71.52 $\pm$<br>25.65                       | 111.30 $\pm$<br>36    | 59.74 $\pm$<br>14.82  | 213.64 $\pm$<br>12.72                  | 148.04 $\pm$<br>8.18  | 182.80 $\pm$<br>20.76 |
| <b>T3</b> | 175.28<br>$\pm$ 8.31            | 182.20 $\pm$<br>5.30 | 164.98 $\pm$<br>8.69 | 110.71 $\pm$<br>3.41           | 109.60 $\pm$<br>1.19 | 105.37 $\pm$<br>1.72 | 341.03 $\pm$<br>47.29                      | 278.81 $\pm$<br>14.07 | 265.89<br>$\pm$ 60.55 | 213.50 $\pm$<br>47.15                  | 256.51 $\pm$<br>43.10 | 341.07 $\pm$<br>26.17 |
| <b>T4</b> | 185.46<br>$\pm$ 9.62            | 198.80 $\pm$<br>9.62 | 188.04 $\pm$<br>4.02 | 118.86 $\pm$<br>3.91           | 116.70 $\pm$<br>1.00 | 118.02 $\pm$<br>3.85 | 284.76 $\pm$<br>45.42                      | 337.92 $\pm$<br>58.97 | 335.28 $\pm$<br>7.49  | 215.06 $\pm$<br>38.59                  | 240.34<br>40.56       | 281.60 $\pm$<br>17.15 |

**Table S2.**

|                                  | <b>Effect</b>  | <b>DFn</b> | <b>DFd</b> | <b>F</b> | <b><i>p</i></b>  |
|----------------------------------|----------------|------------|------------|----------|------------------|
| <b>Embryo width</b>              | Treatment      | 2.00       | 6.00       | 1.10     | 0.39             |
|                                  | Time           | 1.26       | 7.57       | 76.46    | <b>&lt;0.001</b> |
|                                  | Treatment:Time | 2.52       | 7.57       | 0.45     | 0.70             |
| <b>Embryo length</b>             | Treatment      | 2.00       | 6.00       | 0.74     | 0.51             |
|                                  | Time           | 1.16       | 6.96       | 13.94    | <b>&lt;0.01</b>  |
|                                  | Treatment:Time | 2.32       | 6.96       | 0.95     | 0.45             |
| <b>Number hyaline hairs</b>      | Treatment      | 2          | 6          | 0.55     | 0.60             |
|                                  | Time           | 3          | 18         | 199.60   | <b>&lt;0.001</b> |
|                                  | Treatment:Time | 6          | 18         | 0.75     | 0.62             |
| <b>Mean length hyaline hairs</b> | Treatment      | 2          | 4          | 0.42     | 0.68             |
|                                  | Time           | 2          | 8          | 80.18    | <b>&lt;0.001</b> |
|                                  | Treatment:Time | 4          | 8          | 1.75     | 0.232            |
| <b>Length rhizoids</b>           | Treatment      | 2.00       | 6.00       | 0.66     | 0.551            |
|                                  | Time           | 1.43       | 8.55       | 5.89     | <b>&lt;0.05</b>  |
|                                  | Treatment:Time | 2.85       | 8.55       | 0.62     | 0.61             |
| <b>Embryo density</b>            | Treatment      | 2          | 6          | 2.38     | 0.17             |
|                                  | Time           | 1          | 6          | 59.85    | <b>&lt;0.001</b> |
|                                  | Treatment:Time | 2          | 6          | 0.052    | 0.95             |

**Table S3.**

|                                    |                | <b>Chisq</b> | <b>Df</b> | <b>Pr(&gt;Chisq)</b> |
|------------------------------------|----------------|--------------|-----------|----------------------|
| <b>F<sub>v</sub>/F<sub>m</sub></b> | (Intercept)    | 4914.62      | 1         | <b>&lt;0.001</b>     |
|                                    | Treatment      | 2.54         | 5         | 0.77                 |
|                                    | Time           | 55.25        | 3         | <b>&lt;0.001</b>     |
|                                    | Treatment:Time | 52.76        | 15        | <b>&lt;0.001</b>     |
| <b>rETR<sub>max</sub></b>          | (Intercept)    | 407.95       | 1         | <b>&lt;0.001</b>     |
|                                    | Treatment      | 3.67         | 5         | 0.60                 |
|                                    | Time           | 54.51        | 3         | <b>&lt;0.001</b>     |
|                                    | Treatment:Time | 67.85        | 15        | <b>&lt;0.001</b>     |
| <b>α</b>                           | (Intercept)    | 794.435      | 1         | <b>&lt;0.001</b>     |
|                                    | Treatment      | 93.53        | 5         | <b>&lt;0.001</b>     |
|                                    | Time           | 49.501       | 3         | <b>&lt;0.001</b>     |
|                                    | Treatment:Time | 59.34        | 15        | <b>&lt;0.001</b>     |
| <b>NPQ<sub>max</sub></b>           | (Intercept)    | 144.09       | 1         | <b>&lt;0.001</b>     |
|                                    | Treatment      | 5.85         | 5         | 0.32                 |
|                                    | Time           | 4.71         | 3         | 0.19                 |
|                                    | Treatment:Time | 27.66        | 15        | 0.02                 |
| <b>E<sub>k</sub></b>               | (Intercept)    | 669.09       | 1         | <b>&lt;0.001</b>     |
|                                    | Treatment      | 42.83        | 5         | <b>&lt;0.001</b>     |
|                                    | Time           | 22.93        | 3         | <b>&lt;0.001</b>     |
|                                    | Treatment:Time | 29.84        | 15        | 0.01                 |

**Table S4.**

|           | $F_v/F_m$        | $rETR_{max}$ | $\alpha$         | $NPQ_{max}$ | $E_k$ |
|-----------|------------------|--------------|------------------|-------------|-------|
| <b>R1</b> | <b>&lt;0.001</b> | 0.20         | <b>&lt;0.001</b> | 0.46        | 0.39  |
| <b>R2</b> | <b>&lt;0.001</b> | 0.97         | <b>&lt;0.001</b> | 0.93        | 0.01  |
| <b>R3</b> | <b>&lt;0.001</b> | 0.22         | <b>&lt;0.001</b> | 0.84        | 0.86  |
| <b>C1</b> | 1.00             | 1.00         | 0.12             | 0.19        | 0.72  |
| <b>C2</b> | <b>&lt;0.001</b> | 0.99         | 0.45             | 0.14        | 0.95  |
| <b>SW</b> | 0.99             | 0.73         | <b>0.001</b>     | 0.17        | 0.78  |

Table S5.

| contrast | $F_v/F_m$ |        | $rETR_{max}$ |      | $\alpha$ |        | $NPQ_{max}$ |        | $E_k$  |        |
|----------|-----------|--------|--------------|------|----------|--------|-------------|--------|--------|--------|
|          | T0        | T3     | T0           | T3   | T0       | T3     | T0          | T3     | T0     | T3     |
| R1-R2    | 1.00      | 0.87   | 1.00         | 0.72 | 0.89     | 0.48   | 1.00        | 0.85   | 1.00   | 0.90   |
| R1-R3    | 1.00      | 0.68   | 1.00         | 1.00 | <0.001   | 0.01   | 1.00        | 0.99   | 1.00   | 0.93   |
| R1-R4    | 0.94      | <0.001 | 1.00         | 0.22 | <0.001   | <0.001 | 0.37        | <0.001 | <0.001 | <0.001 |
| R1-R5    | 0.97      | 0.49   | 0.67         | 1.00 | <0.001   | <0.001 | 0.90        | 1.00   | 0.17   | 0.75   |
| R1-SW    | 1.00      | <0.001 | 1.00         | 1.00 | 0.53     | 1.00   | 0.97        | 0.001  | 0.10   | 0.21   |
| R2-R3    | 0.97      | 1.00   | 1.00         | 0.60 | <0.001   | 0.47   | 1.00        | 0.99   | 1.00   | 0.35   |
| R2-R4    | 0.80      | <0.001 | 1.00         | 0.96 | <0.001   | 0.11   | 0.61        | 0.002  | <0.001 | 0.03   |
| R2-R5    | 0.86      | 0.99   | 0.74         | 0.81 | <0.001   | 0.04   | 0.98        | 0.97   | 0.05   | 1.00   |
| R2-SW    | 1.00      | <0.001 | 1.00         | 0.91 | 0.98     | 0.41   | 1.00        | 0.04   | 0.03   | 0.76   |
| R3-R4    | 1.00      | <0.001 | 1.00         | 0.15 | 1.00     | 0.96   | 0.34        | <0.001 | <0.001 | <0.001 |
| R3-R5    | 1.00      | 1.00   | 0.81         | 1.00 | 1.00     | 0.85   | 0.87        | 1.00   | 0.12   | 0.20   |
| R3-SW    | 1.00      | <0.001 | 1.00         | 1.00 | 0.001    | 0.009  | 0.96        | 0.007  | 0.07   | 0.03   |
| R4-R5    | 1.00      | <0.001 | 0.53         | 0.30 | 1.00     | 1.00   | 0.94        | <0.001 | 0.20   | 0.06   |
| R4-SW    | 0.95      | 1.00   | 0.99         | 0.49 | <0.001   | <0.001 | 0.93        | 0.99   | 0.63   | 0.69   |
| R5-SW    | 0.97      | <0.001 | 0.93         | 1.00 | 0.003    | <0.001 | 1.00        | 0.005  | 1.00   | 0.90   |



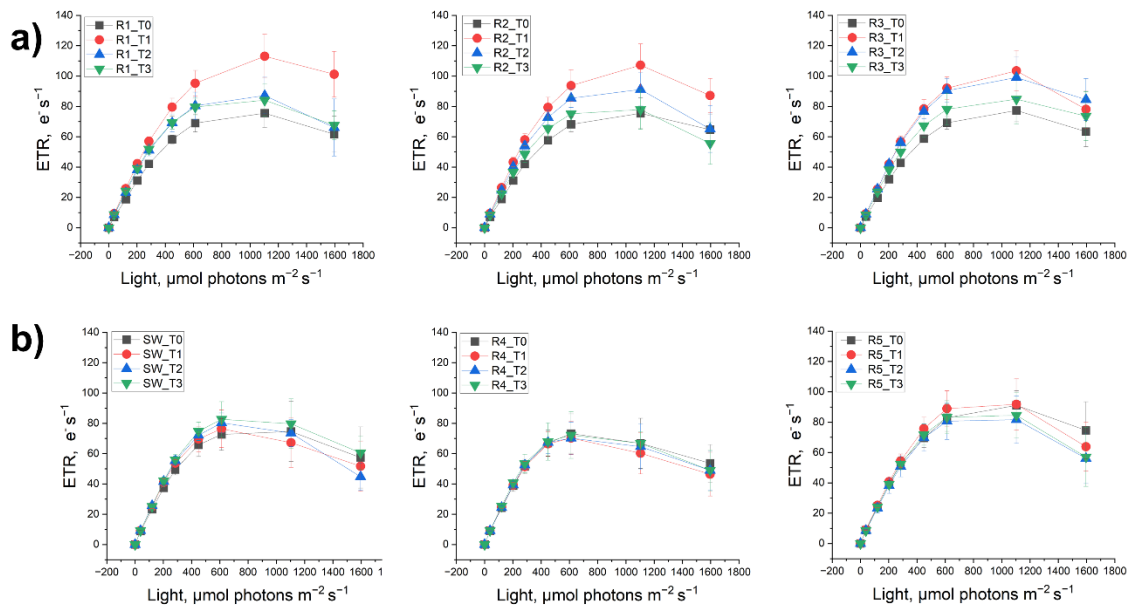

Figure. S2

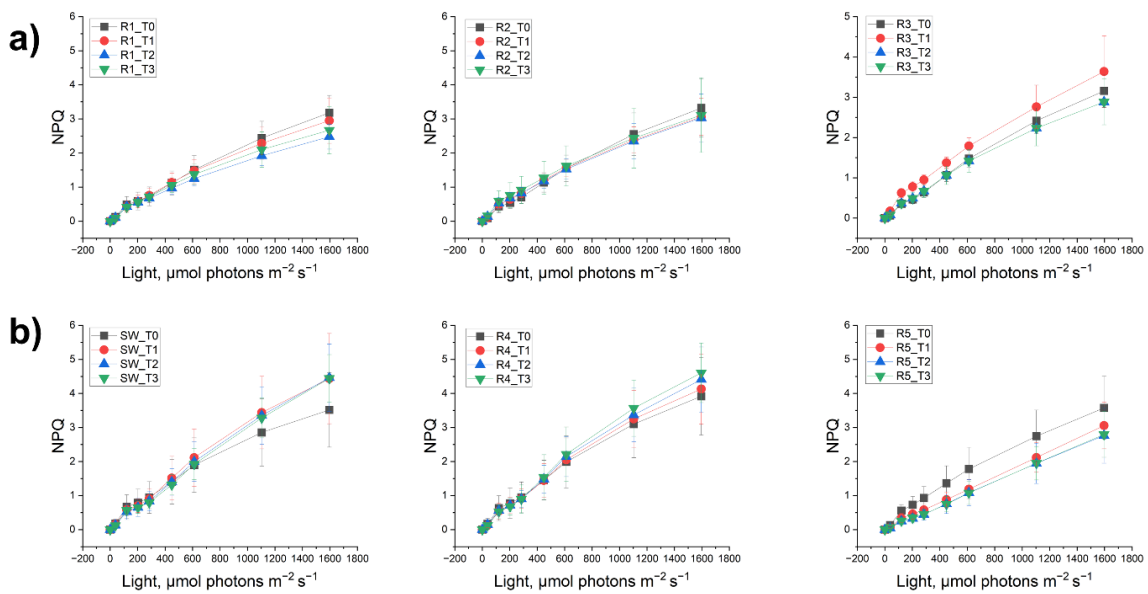

Figure. S3

**Table S6.**

| <b>Contrast</b> | <b>estimate</b> | <b>SE</b> | <b>df</b> | <b>t.ratio</b> | <b>p.value</b> |
|-----------------|-----------------|-----------|-----------|----------------|----------------|
| <b>C1 vs C2</b> | 1.04            | 0.29      | 107       | 3.65           | <b>0.005</b>   |
| <b>C1 vs R1</b> | 0.70            | 0.27      | 107       | 2.55           | 0.12           |
| <b>C1 vs R2</b> | 0.15            | 0.27      | 107       | 0.53           | 0.99           |
| <b>C1 vs R3</b> | -0.12           | 0.27      | 107       | -0.45          | 1.00           |
| <b>C1 vs SW</b> | -0.19           | 0.31      | 108       | -0.62          | 0.99           |
| <b>C2 vs R1</b> | -0.34           | 0.28      | 107       | -1.21          | 0.83           |
| <b>C2 vs R2</b> | -0.89           | 0.28      | 107       | -3.18          | <b>0.02</b>    |
| <b>C2 vs R3</b> | -1.16           | 0.28      | 107       | -4.13          | <b>0.001</b>   |
| <b>C2 vs SW</b> | -1.23           | 0.32      | 108       | -3.86          | <b>0.003</b>   |
| <b>R1 vs R2</b> | -0.55           | 0.27      | 107       | -2.05          | 0.32           |
| <b>R1 vs R3</b> | -0.82           | 0.27      | 107       | -3.04          | <b>0.03</b>    |
| <b>R1 vs SW</b> | -0.89           | 0.31      | 108       | -2.88          | 0.05           |
| <b>R2 vs R3</b> | -0.27           | 0.27      | 107       | -0.99          | 0.92           |
| <b>R2 vs SW</b> | -0.34           | 0.31      | 108       | -1.10          | 0.88           |
| <b>R3 vs SW</b> | -0.07           | 0.31      | 108       | -0.23          | 1.00           |

**Table S7.**

|            |                | <b>Chisq</b> | <b>Df</b> | <b>Pr(&gt;Chisq)</b> |
|------------|----------------|--------------|-----------|----------------------|
| <b>GPP</b> | (Intercept)    | 168.90       | 1         | <b>&lt;0.001</b>     |
|            | Treatment      | 37.05        | 5         | <b>&lt;0.001</b>     |
|            | Time           | 5.20         | 3         | 0.16                 |
|            | Treatment:Time | 39.39        | 15        | <b>&lt;0.001</b>     |
| <b>NP</b>  | (Intercept)    | 122.31       | 1         | <b>&lt;0.001</b>     |
|            | Treatment      | 19.38        | 5         | 0.002                |
|            | Time           | 3.37         | 3         | 0.34                 |
|            | Treatment:Time | 33.74        | 15        | <b>0.004</b>         |
| <b>R</b>   | (Intercept)    | 71.57        | 1         | <b>&lt;0.001</b>     |
|            | Treatment      | 59.68        | 5         | <b>&lt;0.001</b>     |
|            | Time           | 6.94         | 3         | 0.07                 |
|            | Treatment:Time | 59.29        | 15        | <b>&lt;0.001</b>     |

Table S8.

|          | GPP              |             | NP          |             | R                |      |
|----------|------------------|-------------|-------------|-------------|------------------|------|
| contrast | T0               | T3          | T0          | T3          | T0               | T3   |
| R1 - R2  | 0.21             | 0.68        | <b>0.03</b> | 0.74        | 0.95             | 0.98 |
| R1 - R3  | <b>&lt;0.001</b> | 0.99        | <b>0.03</b> | 0.98        | <b>0.002</b>     | 1.00 |
| R1 - C1  | 0.98             | 0.57        | 0.99        | 0.70        | 0.07             | 0.88 |
| R1 - C2  | 1.00             | 0.66        | 1.00        | 0.45        | 1.00             | 1.00 |
| R1 - SW  | 1.00             | 0.74        | 0.89        | 0.84        | 0.24             | 0.95 |
| R2 - R3  | 0.29             | 0.95        | 1.00        | 0.98        | <b>&lt;0.001</b> | 0.99 |
| R2 - C1  | 0.05             | <b>0.03</b> | 0.14        | 0.08        | 0.42             | 0.47 |
| R2 - C2  | 0.49             | <b>0.04</b> | 0.09        | <b>0.02</b> | 0.87             | 0.98 |
| R2 - SW  | 0.28             | 0.07        | 0.46        | 0.14        | 0.73             | 0.62 |
| R3 - C1  | <b>&lt;0.001</b> | 0.22        | 0.15        | 0.30        | <b>&lt;0.001</b> | 0.81 |
| R3 - C2  | <b>0.002</b>     | 0.23        | 0.09        | 0.12        | <b>0.005</b>     | 1.00 |
| R3 - SW  | <b>0.001</b>     | 0.36        | 0.48        | 0.45        | <b>&lt;0.001</b> | 0.91 |
| C1 - C2  | 0.88             | 1.00        | 1.00        | 1.00        | <b>0.04</b>      | 0.85 |
| C1 - SW  | 1.00             | 1.00        | 1.00        | 1.00        | 1.00             | 1.00 |
| C2 - SW  | 1.00             | 1.00        | 0.99        | 1.00        | 0.16             | 0.93 |

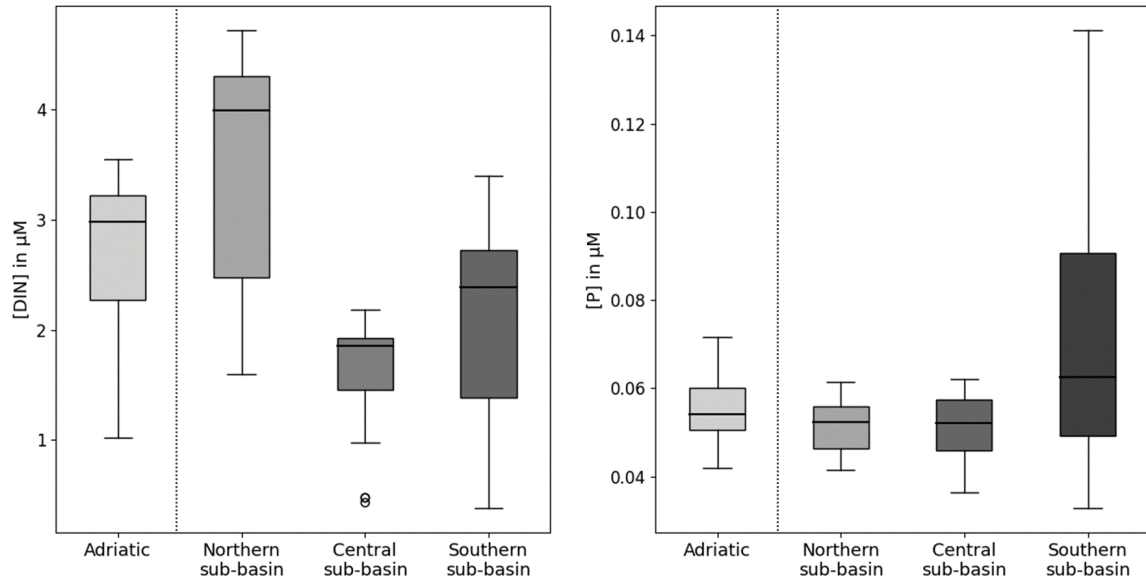

Figure S4.
